# Supplementary material for: DNA methylation-driven gene FAM3D promotes colorectal cancer growth via the ATF4-SESN2-mTORC1 pathway
Source: publisher site journal article supplement (doi:10.18632/aging.206115), 2024-10-10
Supplement: Supplementary file [file aging-v16i19-206115-supplementary-material-SD1.pdf]

SUPPLEMENTARY FIGURES

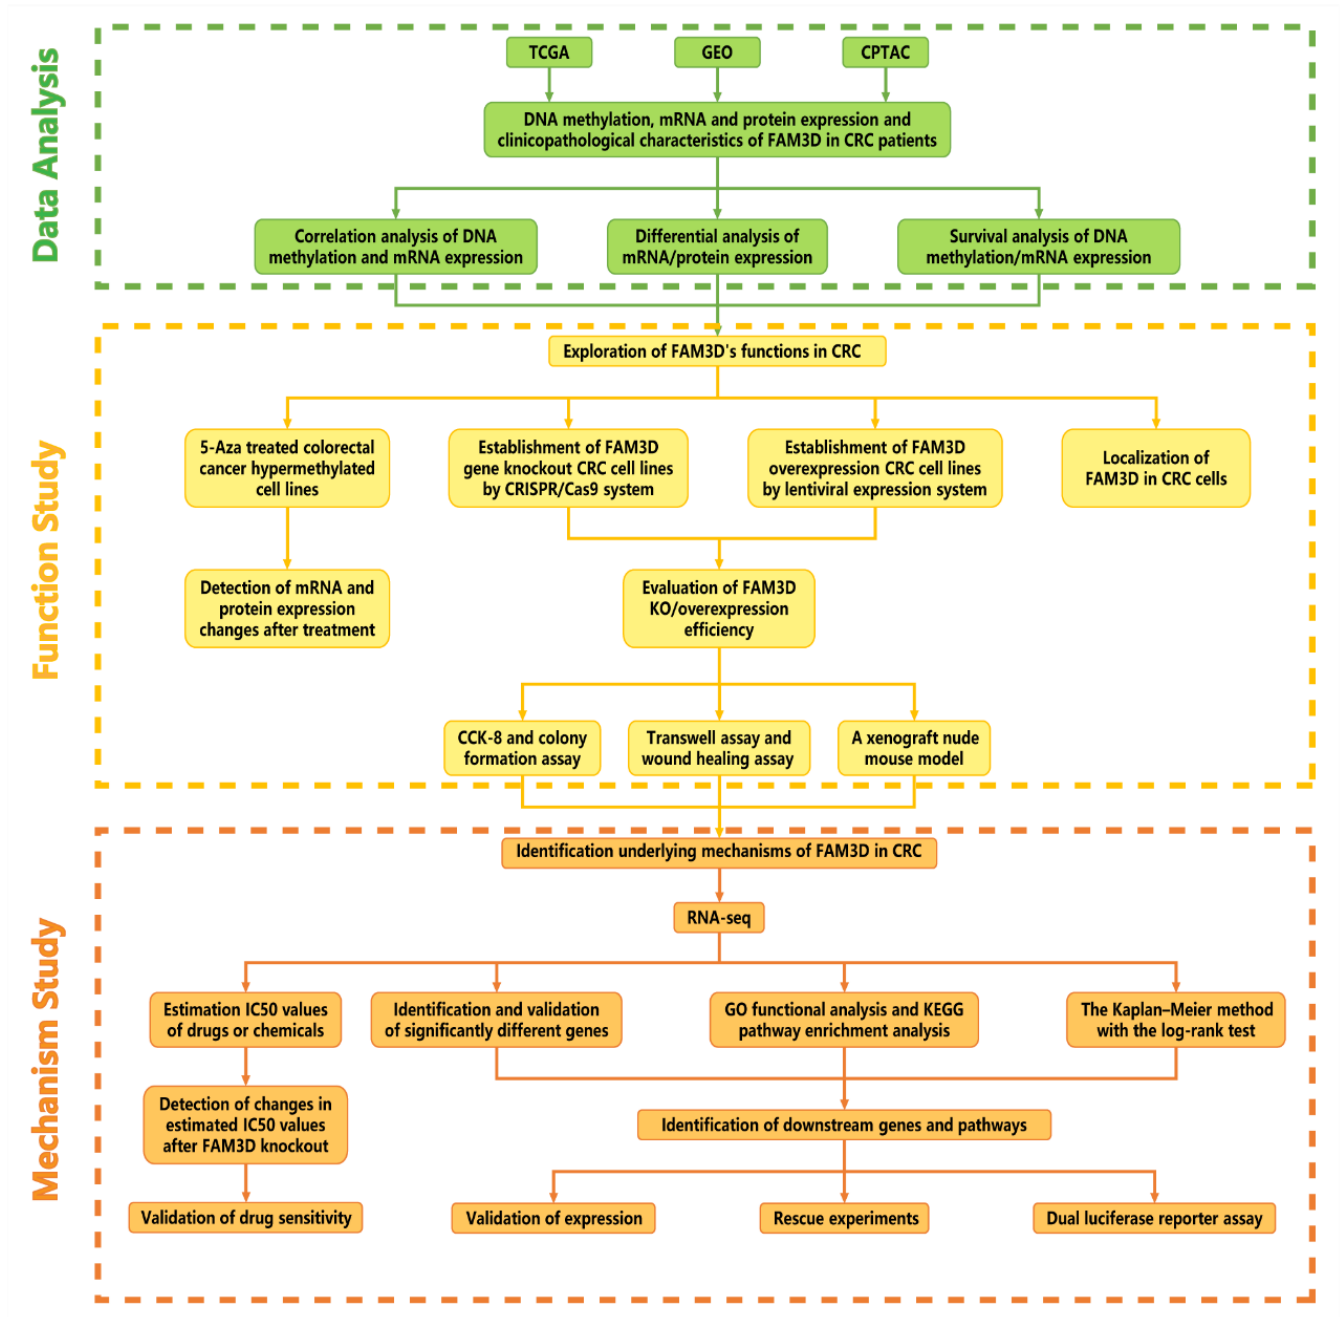

Supplementary Figure 1. A workflow of the present study.

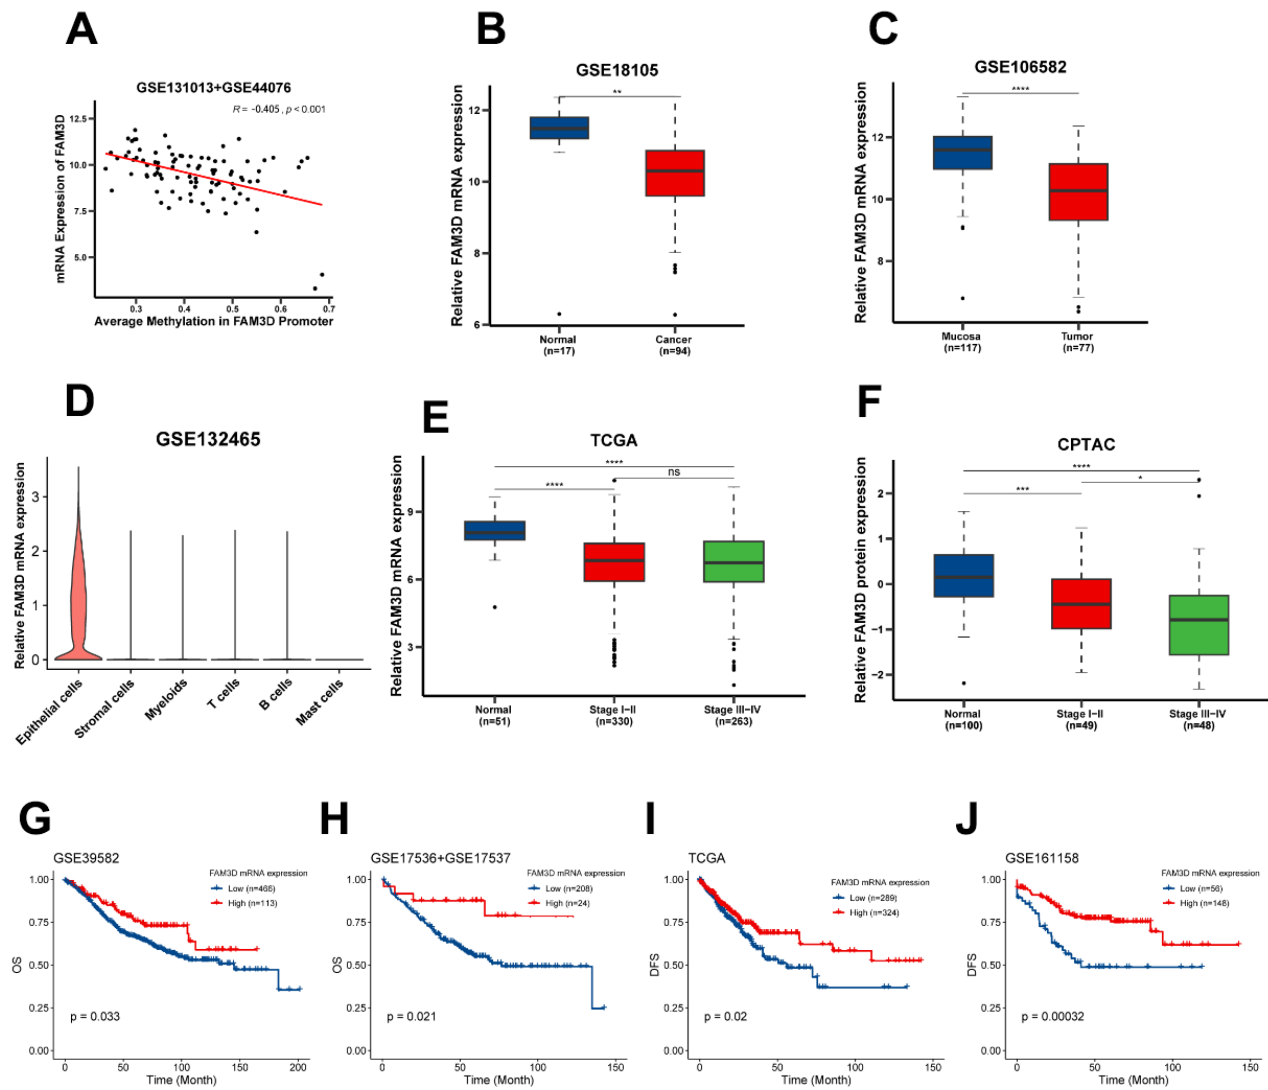

**Supplementary Figure 2. Methylation, expression and prognosis of *FAM3D*.** (A) Correlation between methylation of *FAM3D* promoter and its mRNA expression in GEO cohorts (GSE131013 + GSE44076). (B, C) The mRNA expression of *FAM3D* in adjacent normal tissues and CRC tissues in (B) GSE18105 and (C) GSE106582. (D) *FAM3D* mRNA expression in different cell types in GSE132465. (E, F) *FAM3D* mRNA and protein expression in different tumor stages in TCGA (E, mRNA expression) and CPTAC (F, protein expression). (G, H) Kaplan-Meier curve of OS based on the *FAM3D* expression in tumor tissues of GEO cohorts (G: GSE39582; H: GSE17536 + GSE17537). (I, J) Kaplan-Meier curve of DFS based on the *FAM3D* expression in tumor tissues in (I) TCGA and (J) GSE161158. \* $P < 0.05$ , \*\* $P < 0.01$ , \*\*\* $P < 0.001$ , \*\*\*\* $P < 0.0001$ .

|             |       |                                                                                                  |       |
|-------------|-------|--------------------------------------------------------------------------------------------------|-------|
| WT (131177) | 21143 | CCCCA <sup>sgRNA1</sup> GAGGTTAAAAAGTACAAGT <sup>PAM</sup> GTGGCCTCATCAAGCCCTGCCAGCCAACACTACTTTG | 21202 |
| LoVo        | WT    | CCCCA <sup>sgRNA1</sup> GAGGTTAAAAAGTACAAGT <sup>PAM</sup> GTGGCCTCATCAAGCCCTGCCAGCCAACACTACTTTG |       |
|             | NC    | CCCCA <sup>sgRNA1</sup> GAGGTTAAAAAGTACAAGT <sup>PAM</sup> GTGGCCTCATCAAGCCCTGCCAGCCAACACTACTTTG |       |
|             | KO1   | C-----ATCAAGCCCTGCCAGCCAACACTACTTTG                                                              |       |
| HT29        | WT    | CCCCA <sup>sgRNA1</sup> GAGGTTAAAAAGTACAAGT <sup>PAM</sup> GTGGCCTCATCAAGCCCTGCCAGCCAACACTACTTTG |       |
|             | NC    | CCCCA <sup>sgRNA1</sup> GAGGTTAAAAAGTACAAGT <sup>PAM</sup> GTGGCCTCATCAAGCCCTGCCAGCCAACACTACTTTG |       |
|             | KO1   | CCCCA <sup>sgRNA1</sup> GAGGTTAAAAAGTACAAGT <sup>PAM</sup> GTGGCCTCATCAAGCCCTGCCAGCCAACACTACTTTG |       |
| WT (131177) | 21229 | AACGTCGTGGGCCCTACTATGTGCTTTGAAGA <sup>PAM</sup> CCGCATGTAAGTACCTAAGACACA <sup>sgRNA2</sup> AACTA | 21288 |
| LoVo        | WT    | AACGTCGTGGGCCCTACTATGTGCTTTGAAGACCGCATGTAAGTACCTAAGACACA                                         |       |
|             | NC    | AACGTCGTGGGCCCTACTATGTGCTTTGAAGACCGCATGTAAGTACCTAAGACACA                                         |       |
|             | KO2   | AACGTCGTGGGCCCTACTATGTGCTTTGAAG -----TACCTAAGACACA                                               |       |
| HT29        | WT    | AACGTCGTGGGCCCTACTATGTGCTTTGAAGACCGCATGTAAGTACCTAAGACACA                                         |       |
|             | NC    | AACGTCGTGGGCCCTACTATGTGCTTTGAAGACCGCATGTAAGTACCTAAGACACA                                         |       |
|             | KO2   | AACGTCGTGGGCCCTACTATGTGCTTTGAAGACC-----AACTA                                                     |       |

Red: sgRNA; Blue: PAM; Green: Insertion

**Supplementary Figure 3. Genomic DNAs from four cell types (WT *FAM3D*, NC, KO1, and KO2 cells) of LoVo and HT29 cells were isolated and PCR amplicons flanking the CRISPR/Cas9-targeted regions were sequenced.** Sequence alignments of bases 21143–21202 and 21229–21288 of the *FAM3D* gene are shown. Numbering is based on the entire *FAM3D* gene sequence (NCBI Gene: 131177).

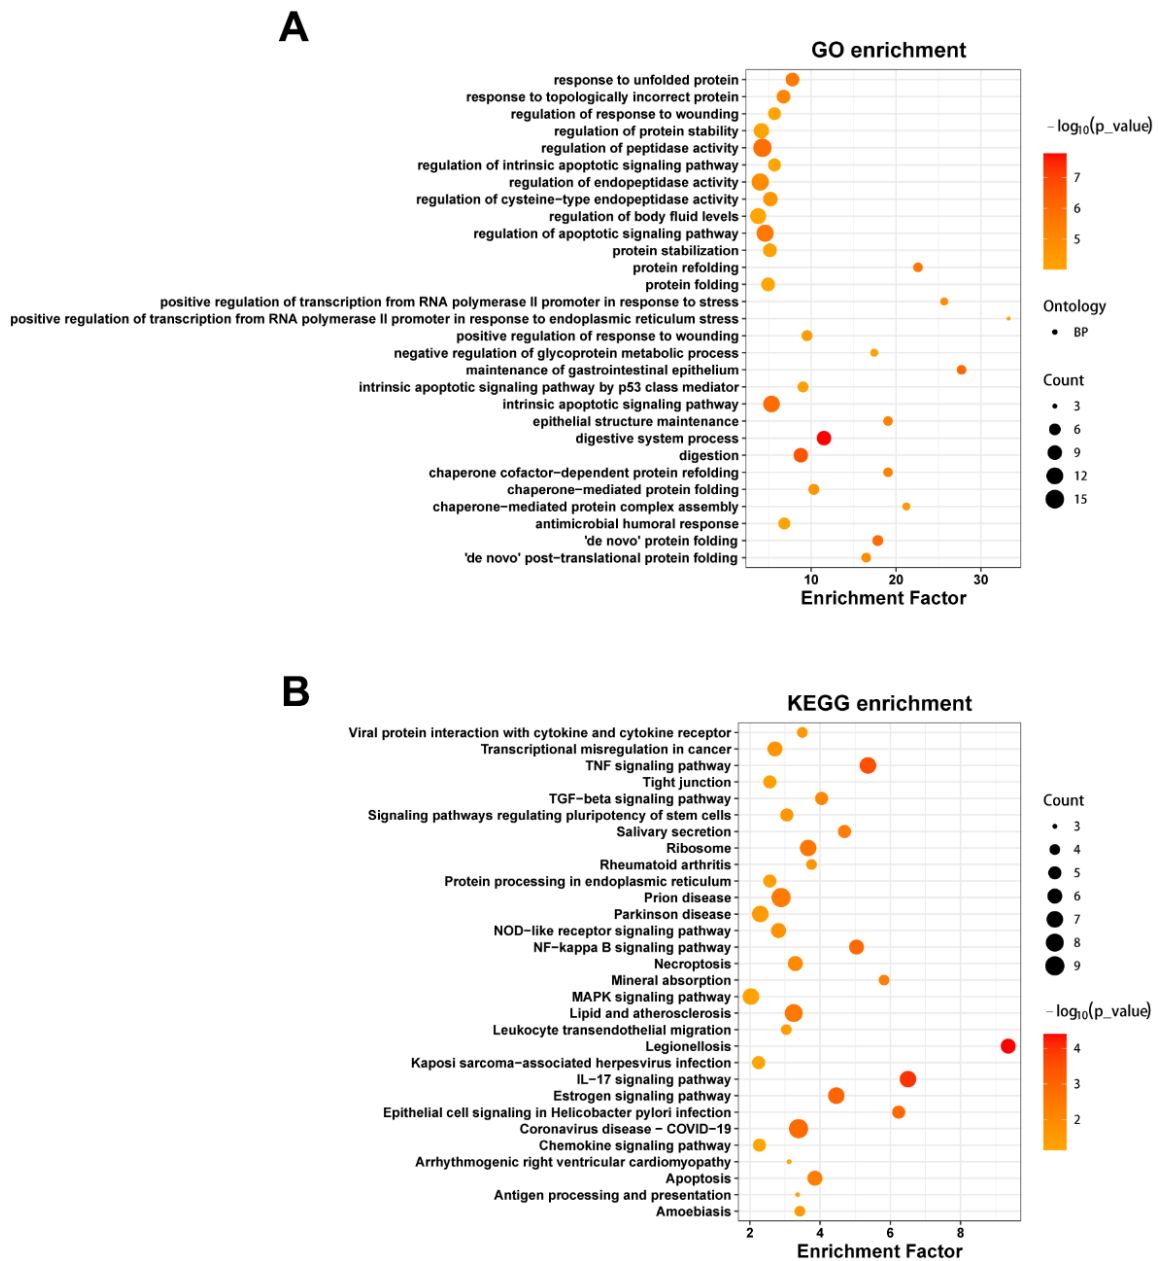

**Supplementary Figure 4. Bioinformatics analysis for *FAM3D* overexpression CRC cells in GSE132465. (A) GO functional analysis showed the top 29 biological processes that are enriched in DEGs. (B) KEGG enrichment analysis showed the top 30 signaling pathways that are enriched in DEGs.**
