# Supplementary material for: DNA methylation-driven gene FAM3D promotes colorectal cancer growth via the ATF4-SESN2-mTORC1 pathway
Source: publisher site journal article supplement (doi:10.18632/aging.206115), 2024-10-10
Supplement: Supplementary file [file aging-v16i19-206115-supplementary-material-SD2.pdf]

## SUPPLEMENTARY TABLES

Supplementary Table 1. Associations of *FAM3D* methylation and CRC overall survival in TCGA.

| Variables                       | Number (%)   | Univariate Cox   |                 | Multivariate Cox           |              |
|---------------------------------|--------------|------------------|-----------------|----------------------------|--------------|
|                                 |              | HR (95% CI)      | P-Value         | HR <sub>adj</sub> (95% CI) | P-Value      |
| <b>Age</b>                      |              |                  |                 |                            |              |
| Age ≥ 60 years                  | 199 (64.61%) | 2.02 (1.12-3.63) | <b>0.019</b>    | 2.52 (1.38-4.58)           | <b>0.003</b> |
| Age < 60 years                  | 109 (35.39%) |                  |                 |                            |              |
| <b>Gender</b>                   |              |                  |                 |                            |              |
| Male                            | 166 (53.90%) | 1.16 (0.72-1.87) | 0.55            | -                          | -            |
| Female                          | 142 (46.10%) |                  |                 |                            |              |
| <b>T stage</b>                  |              |                  |                 |                            |              |
| T3-4                            | 257 (83.44%) | 2.92 (1.06-8.05) | <b>0.038</b>    | 1.50 (0.52-4.31)           | 0.45         |
| T1-2                            | 51 (16.56%)  |                  |                 |                            |              |
| <b>N stage</b>                  |              |                  |                 |                            |              |
| N1-3                            | 133 (43.18%) | 2.89 (1.76-4.75) | <b>2.88e-05</b> | 2.14 (1.21-3.79)           | <b>0.009</b> |
| N0                              | 175 (56.82%) |                  |                 |                            |              |
| <b>M stage</b>                  |              |                  |                 |                            |              |
| M1                              | 51 (16.56%)  | 3.50 (2.09-5.86) | <b>1.91e-06</b> | 2.70 (1.50-4.86)           | <b>0.001</b> |
| M0                              | 257 (83.44%) |                  |                 |                            |              |
| <b><i>FAM3D</i> methylation</b> |              |                  |                 |                            |              |
| High                            | 71 (23.05%)  | 2.22 (1.35-3.63) | <b>0.002</b>    | 2.02 (1.23-3.34)           | <b>0.006</b> |
| Low                             | 237 (76.95%) |                  |                 |                            |              |

Supplementary Table 2. Associations of *FAM3D* mRNA and CRC overall survival in TCGA.

| Variables                | Number (%)   | Univariate Cox        |                 | Multivariate Cox           |                 |
|--------------------------|--------------|-----------------------|-----------------|----------------------------|-----------------|
|                          |              | HR (95% CI)           | P-Value         | HR <sub>adj</sub> (95% CI) | P-Value         |
| <b>Age</b>               |              |                       |                 |                            |                 |
| Age ≥ 60 years           | 337 (72.16%) | 1.92(1.12-3.31)       | <b>0.018</b>    | 2.75 (1.57-4.80)           | <b>4.05e-04</b> |
| Age < 60 years           | 130 (27.84%) |                       |                 |                            |                 |
| <b>Gender</b>            |              |                       |                 |                            |                 |
| Male                     | 246 (52.68%) | 0.9879649 (0.65-1.50) | 0.955           | -                          | -               |
| Female                   | 221 (47.32%) |                       |                 |                            |                 |
| <b>T stage</b>           |              |                       |                 |                            |                 |
| T3-4                     | 374 (80.09%) | 3.58 (1.45-8.84)      | <b>0.006</b>    | 2.43 (0.96-6.14)           | 0.061           |
| T1-2                     | 93 (19.91%)  |                       |                 |                            |                 |
| <b>N stage</b>           |              |                       |                 |                            |                 |
| N1-3                     | 197 (42.18%) | 3.16 (2.03-4.91)      | <b>3.09e-07</b> | 1.96 (1.15-3.35)           | <b>0.013</b>    |
| N0                       | 270 (57.82%) |                       |                 |                            |                 |
| <b>M stage</b>           |              |                       |                 |                            |                 |
| M1                       | 72 (15.42%)  | 4.50 (2.91-6.94)      | <b>1.13e-11</b> | 3.24 (1.95-5.39)           | <b>5.55e-06</b> |
| M0                       | 395 (84.58%) |                       |                 |                            |                 |
| <b><i>FAM3D</i> mRNA</b> |              |                       |                 |                            |                 |
| High                     | 297 (63.60%) | 0.56 (0.37-0.84)      | <b>0.006</b>    | 0.51 (0.33-0.78)           | <b>0.002</b>    |
| Low                      | 170 (36.40%) |                       |                 |                            |                 |

**Supplementary Table 3. Associations of *FAM3D* mRNA and CRC overall survival in GSE39582.**

| Variables                | Number (%)   | Univariate Cox   |                 | Multivariate Cox           |                 |
|--------------------------|--------------|------------------|-----------------|----------------------------|-----------------|
|                          |              | HR (95% CI)      | P-Value         | HR <sub>adj</sub> (95% CI) | P-Value         |
| <b>Age</b>               |              |                  |                 |                            |                 |
| Age ≥ 60 years           | 425 (73.53%) | 1.41 (0.99-1.99) | 0.052           | -                          | -               |
| Age < 60 years           | 153 (26.47%) |                  |                 |                            |                 |
| <b>Gender</b>            |              |                  |                 |                            |                 |
| Male                     | 319 (55.09%) | 1.31 (0.98-1.75) | 0.067           | -                          | -               |
| Female                   | 260 (44.91%) |                  |                 |                            |                 |
| <b>Stage</b>             |              |                  |                 |                            |                 |
| III-IV                   | 273 (47.15%) | 1.80 (1.35-2.39) | <b>5.62e-05</b> | 1.78 (1.34-2.36)           | <b>8.01e-05</b> |
| I-II                     | 306 (52.85%) |                  |                 |                            |                 |
| <b><i>FAM3D</i> mRNA</b> |              |                  |                 |                            |                 |
| High                     | 113 (19.52%) | 0.65 (0.44-0.97) | <b>0.033</b>    | 0.67 (0.45-0.99)           | <b>0.049</b>    |
| Low                      | 466 (80.48%) |                  |                 |                            |                 |

**Supplementary Table 4. Associations of *FAM3D* mRNA and CRC disease free survival in GSE161158.**

| Variables                | Number (%)   | Univariate Cox   |                 | Multivariate Cox           |                 |
|--------------------------|--------------|------------------|-----------------|----------------------------|-----------------|
|                          |              | HR (95% CI)      | P-Value         | HR <sub>adj</sub> (95% CI) | P-Value         |
| <b>Age</b>               |              |                  |                 |                            |                 |
| Age ≥ 60 years           | 135 (66.18%) | 0.60 (0.36-1.00) | 0.052           | -                          | -               |
| Age < 60 years           | 69 (33.82%)  |                  |                 |                            |                 |
| <b>Stage</b>             |              |                  |                 |                            |                 |
| III-IV                   | 97 (47.55%)  | 3.62 (2.04-6.43) | <b>1.15e-05</b> | 3.51 (1.98-6.24)           | <b>1.84e-05</b> |
| I-II                     | 107 (52.45%) |                  |                 |                            |                 |
| <b><i>FAM3D</i> mRNA</b> |              |                  |                 |                            |                 |
| High                     | 148 (72.55%) | 0.40 (0.24-0.67) | <b>4.94e-04</b> | 0.42 (0.25-0.70)           | <b>0.001</b>    |
| Low                      | 56 (27.45%)  |                  |                 |                            |                 |
