# Supplementary material for: DNA methylation-driven gene FAM3D promotes colorectal cancer growth via the ATF4-SESN2-mTORC1 pathway
Source: publisher site journal article supplement (doi:10.18632/aging.206115), 2024-10-10
Supplement: Supplementary file [file aging-v16i19-206115-supplementary-material-SD4.pdf]

**Supplementary Table 6. Primers used in the study.**

| <b>Primer</b>            | <b>Sequence (5' - 3')</b>                    |
|--------------------------|----------------------------------------------|
| Clone primers            |                                              |
| CDS_FAM3D_F <sup>a</sup> | CTAGCCTGATACGAACTCGGATGAGAG<br>TGTCAGGTGTGCT |
| CDS_FAM3D_R <sup>b</sup> | CGTCATGGTCTTTGTAGTCGAAATGGC<br>TTCGGGGGCATGC |
| RT-qPCR primers          |                                              |
| FAM3D_F                  | ATGAGAGTGTGAGGTGTGCTTC                       |
| FAM3D_R                  | CTTGATGAGGCCACACTTGTAC                       |
| SESN2_F                  | AAGGACTACCTGCGGTTTCG                         |
| SESN2_R                  | CGCCCAGAGGACATCAGTG                          |
| GAPDH_F                  | GGAGCGAGATCCCCTCCAAAAT                       |
| GAPDH_R                  | GGCTGTTGTCATACTTCTCATGG                      |
| BAX_F                    | CCCGAGAGGTCTTTTTCCGAG                        |
| BAX_R                    | CCAGCCCATGATGGTTCTGAT                        |
| P21_F                    | TGTCCGTCAGAACCCATGC                          |
| P21_R                    | AAAGTCGAAGTTCCATCGCTC                        |
| BBC3_F                   | GACCTCAACGCACAGTACGAG                        |
| BBC3_R                   | AGGAGTCCCATGATGAGATTGT                       |
| TNFRSF10B_F              | ATGGAACAACGGGGACAGAAC                        |
| TNFRSF10B_R              | CTGCTGGGGAGCTAGGTCT                          |
| TP53_F                   | CAGCACATGACGGAGGTTGT                         |
| TP53_R                   | TCATCCAAATACTCCACACGC                        |
| ATF4_F                   | CCCTTCACCTTCTTACAACCTC                       |
| ATF4_R                   | TGCCCAGCTCTAAACTAAAGGA                       |
| Gene knockout primers    |                                              |
| FAM3D_sgRNA1_F           | CACCGGAGGTTAAAAAGTACAAGTG                    |
| FAM3D_sgRNA1_R           | AAACCACTTGTACTTTTTAACCTCC                    |
| FAM3D_sgRNA2_F           | CACCGGTGTCTTAGGTACTTACATG                    |
| FAM3D_sgRNA2_R           | AAACCATGTAAGTACCTAAGACACC                    |

<sup>a</sup>suffix "F" represents forward primer; <sup>b</sup>suffix "R" represents reverse primer.
